# Supplementary material for: The KRAS G12C mutation in NSCLC: from target to resistance
Source: Preprints.org preprint supplement (doi:10.20944/preprints202105.0471.v1), 2021-05-20
Supplement: Supplementary file 2 [file supplementary]

| **Drug** | **Sponsor** | **Stage** | **NCT #** |
| --- | --- | --- | --- |
| Sotorasib | Amgen | Phase I-III | NCT04185883 |
| Adagrasib | Mirati | Phase I-III | NCT03785249 |
| GDC-6036 | Genentech/Roche | Phase I | NCT04449874 |
| JNJ-74699157 | Janssen | Phase I | NCT04006301 |
| D-1553 | Inventis Bio | Phase I | NCT04585035 |

Table 1

**TKIs KRAS G12C Inhibitors in Clinical Development**
